# Supplementary material for: ADAMS project: a genetic Association study in individuals from Diverse Ancestral backgrounds with Multiple Sclerosis based in the UK
Source: HighWire-hosted journal article supplement (doi:10.1136/bmjopen-2023-071656), 2023-05-01
Supplement: bmjopen-2023-071656supp001_data_supplement.pdf [file bmjopen-2023-071656supp001_data_supplement.pdf]

| Full name                 | Primary affiliation                                                                                                                                                    |
|---------------------------|------------------------------------------------------------------------------------------------------------------------------------------------------------------------|
| Alastair J Noyce          | Preventive Neurology Unit, Wolfson Institute of Population Health, Queen Mary University of London                                                                     |
| Angie Dunne               | Leeds Centre for Neurosciences, Leeds teaching Hospitals NHS Trust                                                                                                     |
| Antonio Scalfari          | Centre of Neuroscience, Department of Medicine, Imperial College London                                                                                                |
| Benjamin M Jacobs         | Preventive Neurology Unit, Wolfson Institute of Population Health, Queen Mary University of London                                                                     |
| Bruno Gran                | Department of Neurology, Nottingham University Hospitals NHS Trust; Mental Health and Clinical Neuroscience Academic Unit, University of Nottingham School of Medicine |
| Charles A Mein            | Barts and the London Genome Centre, Queen Mary University of London                                                                                                    |
| Charlotte Sellers         | Preventive Neurology Unit, Wolfson Institute of Population Health, Queen Mary University of London                                                                     |
| Cord Spilker              | Bradford Teaching Hospital Foundation Trust                                                                                                                            |
| David Rog                 | Manchester Centre for Clinical Neurosciences, Northern Care Alliance NHS Trust                                                                                         |
| Eli Silber                | Kings College Hospital and Lewisham and Greenwich NHS Trusts                                                                                                           |
| Elisa Visentin            | Research and Innovation, Queen's Hospital, BHRUT                                                                                                                       |
| Elizabeth Lindsey Bezzina | Kings College Hospital and Lewisham and Greenwich NHS Trusts                                                                                                           |
| Emeka Uzochukwu           | Division of Psychological Medicine and Clinical Neurosciences, Cardiff University                                                                                      |
| Emma Tallantyre           | 1. Division of Psychological Medicine and Clinical Neurosciences, Cardiff University<br>2. Department of Clinical Neurology, University Hospital of Wales, Cardiff.    |
| Eva Wozniak               | Barts and the London Genome Centre, Queen Mary University of London                                                                                                    |
| Eve Sacre                 | Leeds Centre for Neurosciences, Leeds teaching Hospitals NHS Trust                                                                                                     |
| Gavin Giovannoni          | Preventive Neurology Unit, Wolfson Institute of Population Health, Queen Mary University of London                                                                     |
| Helen L. Ford             | Leeds Centre for Neurosciences, Leeds Teaching Hospitals NHS Trust                                                                                                     |
| Huw Morris                | Department of Clinical and Movement Neuroscience, UCL Queen Square Institute of Neurology, London UK                                                                   |
| Jade Harris               | Northern Care Alliance NHS Trust                                                                                                                                       |
| Joshua Breedon            | Preventive Neurology Unit, Wolfson Institute of Population Health, Queen Mary University of London                                                                     |
| Judith Brooke             | Northern Care Alliance NHS Trust                                                                                                                                       |
| Karim L. Kreft            | Department of Neurology, University Hospital of Wales, Cardiff                                                                                                         |
| Katila George             | Preventive Neurology Unit, Wolfson Institute of Population Health, Queen Mary University of London                                                                     |
| Luisa Schalk              | Preventive Neurology Unit, Wolfson Institute of Population Health, Queen Mary University of London                                                                     |
| Martin O'Malley           | Leeds Centre for Neurosciences, Leeds teaching Hospitals NHS Trust                                                                                                     |
| Michelle Peter            | NHS North Thames Genomic Laboratory Hub, Great Ormond Street Hospital for Children NHS Foundation Trust, London, UK                                                    |
| Miriam Mattoscio          | Department of neuroscience, Queen's Hospital, BHRUT NHS Trust                                                                                                          |
| Neisha Rhule              | Queen Elizabeth Hospital (Lewisham and Greenwich NHS Trust)                                                                                                            |
| Nimisha Vinod             | Northern Care Alliance NHS Trust                                                                                                                                       |
| Outi Quinn                | Bradford Teaching Hospital Foundation Trust                                                                                                                            |
| Ramya Shamji              | Research and Innovation, Queen's Hospital, BHRUT                                                                                                                       |
| Rashmi Kaimal             | Preventive Neurology Unit, Wolfson Institute of Population Health, Queen Mary University of London                                                                     |
| Rod Middleton             | Population Data Science, Swansea University Medical School, Swansea                                                                                                    |
| Roxanne Murray            | Preventive Neurology Unit, Wolfson Institute of Population Health, Queen Mary University of London                                                                     |
| Ruth Bellfield            | Bradford Teaching Hospital Foundation Trust                                                                                                                            |
| Ruth Dobson               | Preventive Neurology Unit, Wolfson Institute of Population Health, Queen Mary University of London                                                                     |
| Sadid Hoque               | Preventive Neurology Unit, Wolfson Institute of Population Health, Queen Mary University of London                                                                     |
| Stephanie Mitchell        | Northern Care Alliance NHS Trust                                                                                                                                       |
| Stephen Sawcer            | University of Cambridge, Department of Clinical Neuroscience, Addenbrookes Hospital, Hills Road, Cambridge, CB22 3TD                                                   |
| Tarunya Arun              | University Hospitals of Coventry and Warwickshire                                                                                                                      |
| Tatiana Pogreban          | Research and Innovation, Queen's Hospital, BHRUT                                                                                                                       |
| Terri-Louise Brown        | Preventive Neurology Unit, Wolfson Institute of Population Health, Queen Mary University of London                                                                     |
| Thamanna Begum            | Preventive Neurology Unit, Wolfson Institute of Population Health, Queen Mary University of London                                                                     |
| Veronica Antoine          | Northern Care Alliance NHS Trust                                                                                                                                       |
